# Supplementary material
Source: PubMed Central journal article supplement (PMC8568639)
Supplement: NIHMS1722924-supplement-1.pdf [file NIHMS1722924-supplement-1.pdf]

## SUPPLEMENTAL MATERIAL

### Drug Use Stigma Scale

**Enacted stigma items** (responses: *never* [0] / *rarely* [1] / *sometimes* [2] / *frequently* [3] / *refused* [998])

1. How often has a hospital worker mistreated you because of your drug use?
2. How often have you been refused medical care or denied hospital services because of your drug use?
3. How often have you been asked to stay away from children because of your drug use?
4. How often have family members forced you to move out of your home because of your drug use?
5. How often has someone threatened to hurt you physically because of your drug use?
6. How often have you been refused housing because people suspect that you use drugs?

**Vicarious stigma items** (responses: *never* [0] / *rarely* [1] / *sometimes* [2] / *frequently* [3] / *refused* [998])

7. How often have you heard studies about people being mistreated by hospital workers because of their drug use?
8. How often have you heard stories about people being mistreated when getting HIV testing because of their drug use?
9. How often have you heard stories about people being mistreated when getting HIV treatment because of their drug use?
10. How often have you heard stories about someone being refused care from their family when they were sick because of their drug use?
11. How often have you heard stories about people being forced by family members to leave their home because they used drugs?
12. How often have you heard stories about a village or community ostracizing someone because they used drugs?

**Felt normative stigma items** (responses: *no one* [0] / *very few people* [1] / *some people* [2] / *most people* [3] / *refused* [998])

13. In your community, how many people avoid visiting the homes of people who use drugs?
14. In your community, how many people think that family members who use drugs have brought shame on their families?
15. In your community, how many people think that people who use drugs should feel guilty about it?
16. In your community, how many people think that people who use drugs are disgusting?
17. In your community, how many people think that people who use drugs are paying for their karma or sins?

**Internalized stigma items** (responses: *not at all* [0] / *a little* [1] / *a fair amount* [2] / *a great deal* [3] / *refused* [998])

18. How much do you feel that you should avoid visiting people because of their drug use?
19. How much do you feel that you have brought shame on your family because of your drug use?
20. How much do you feel guilty about your drug use?
21. How much do you feel disgusting because of your drug use?
22. How much do you feel that you use drugs because you are paying for your karma or sins?

**Supplemental Figure 1.** Maps of study sites and corresponding sample sizes in the analytic sample.

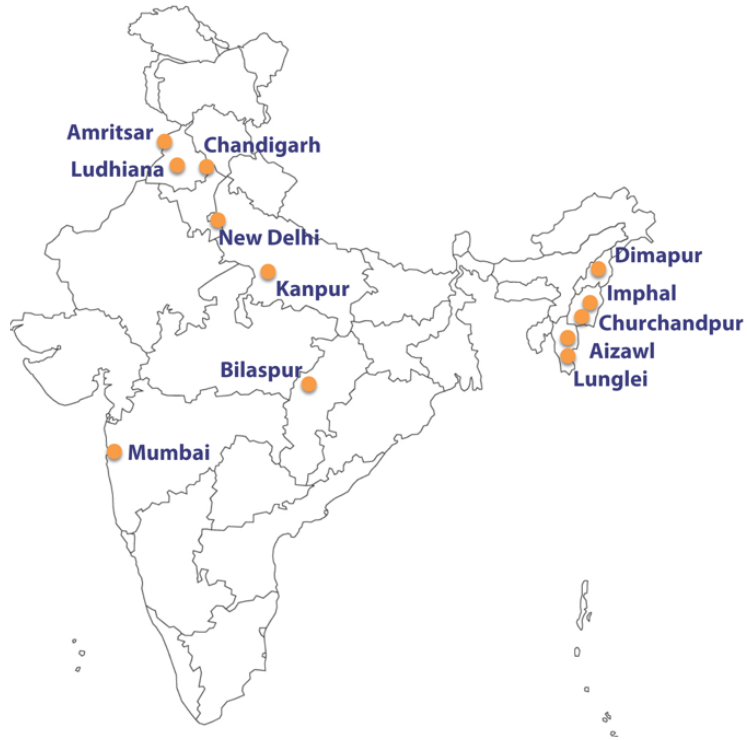

| City / Study site    | Overall<br>(n=11,663) | HCV RNA-<br>(n=6,617) | HCV RNA+<br>(n=5,046) |
|----------------------|-----------------------|-----------------------|-----------------------|
| <i>Aizawl</i>        | 1000                  | 272                   | 728                   |
| <i>Amritsar</i>      | 999                   | 450                   | 549                   |
| <i>Bilaspur</i>      | 1000                  | 525                   | 475                   |
| <i>Chandigarh</i>    | 991                   | 531                   | 460                   |
| <i>Churachandpur</i> | 994                   | 364                   | 630                   |
| <i>New Delhi</i>     | 999                   | 447                   | 552                   |
| <i>Dimapur</i>       | 999                   | 947                   | 52                    |
| <i>Imphal</i>        | 997                   | 501                   | 496                   |
| <i>Kanpur</i>        | 995                   | 642                   | 353                   |
| <i>Ludhiana</i>      | 974                   | 534                   | 440                   |
| <i>Lunglei</i>       | 999                   | 859                   | 140                   |
| <i>Mumbai</i>        | 716                   | 545                   | 171                   |

**Supplemental Table 1.** Distribution of responses for each stigma item in the overall study population (n=11,663).

| <b>Enacted stigma items</b>                                    | <b>No. of Participants (%)</b> |                        |                    |                    |                |
|----------------------------------------------------------------|--------------------------------|------------------------|--------------------|--------------------|----------------|
|                                                                | <i>Never</i>                   | <i>Rarely</i>          | <i>Sometimes</i>   | <i>Frequently</i>  | <i>Refused</i> |
| 1. <i>Mistreated by hospital worker</i>                        | 9829 (84.3)                    | 938 (8.0)              | 659 (5.7)          | 165 (1.4)          | 72 (0.6)       |
| 2. <i>Denied medical care or hospital services</i>             | 10003 (85.8)                   | 885 (7.6)              | 590 (5.1)          | 151 (1.3)          | 34 (0.3)       |
| 3. <i>Told to stay away from children</i>                      | 9028 (77.4)                    | 1020 (8.7)             | 1224 (10.5)        | 344 (2.9)          | 47 (0.4)       |
| 4. <i>Forced to move out of home by family</i>                 | 8417 (72.2)                    | 1231 (10.6)            | 1419 (12.2)        | 532 (4.6)          | 64 (0.5)       |
| 5. <i>Received threat of physical harm</i>                     | 7827 (67.1)                    | 1496 (12.8)            | 1722 (14.8)        | 572 (4.9)          | 46 (0.4)       |
| 6. <i>Denied housing</i>                                       | 9346 (80.1)                    | 884 (7.6)              | 972 (8.3)          | 400 (3.4)          | 61 (0.5)       |
| <b>Vicarious stigma items</b>                                  | <i>Never</i>                   | <i>Rarely</i>          | <i>Sometimes</i>   | <i>Frequently</i>  | <i>Refused</i> |
| 7. <i>Mistreated by hospital workers</i>                       | 7909 (67.8)                    | 1583 (13.6)            | 1622 (13.9)        | 502 (4.3)          | 47 (0.4)       |
| 8. <i>Mistreated when getting HIV testing</i>                  | 8591 (73.7)                    | 1371 (11.8)            | 1254 (10.8)        | 402 (3.4)          | 45 (0.4)       |
| 9. <i>Mistreated when getting HIV treatment</i>                | 8514 (73.0)                    | 1413 (12.1)            | 1249 (10.7)        | 426 (3.7)          | 61 (0.5)       |
| 10. <i>Refused care from family when sick</i>                  | 5767 (49.4)                    | 2014 (17.3)            | 2698 (23.1)        | 1128 (9.7)         | 56 (0.5)       |
| 11. <i>Forced to move out of home by family</i>                | 5037 (43.2)                    | 1950 (16.7)            | 3131 (26.8)        | 1481 (12.7)        | 64 (0.5)       |
| 12. <i>Ostracized by community or village</i>                  | 5726 (49.1)                    | 1841 (15.8)            | 2898 (24.8)        | 1135 (9.7)         | 63 (0.5)       |
| <b>Felt normative stigma items</b>                             | <i>No One</i>                  | <i>Very few people</i> | <i>Some people</i> | <i>Most people</i> | <i>Refused</i> |
| 13. <i>Avoid visiting homes of PWUD</i>                        | 3480 (29.8)                    | 2210 (18.9)            | 3069 (26.3)        | 2796 (24.0)        | 108 (0.9)      |
| 14. <i>PWUD bring shame to their families</i>                  | 2452 (21.0)                    | 2293 (19.7)            | 3134 (26.9)        | 3654 (31.3)        | 130 (1.1)      |
| 15. <i>PWUD should feel guilty</i>                             | 2250 (19.3)                    | 2202 (18.9)            | 3073 (26.3)        | 4004 (34.3)        | 134 (1.1)      |
| 16. <i>PWUD are disgusting</i>                                 | 2159 (18.5)                    | 2327 (20.0)            | 3104 (26.6)        | 3955 (33.9)        | 118 (1.0)      |
| 17. <i>PWUD are paying for their karma or sins</i>             | 3259 (27.9)                    | 2206 (18.9)            | 3097 (26.6)        | 2947 (25.3)        | 154 (1.3)      |
| <b>Internalized stigma items</b>                               | <i>No One</i>                  | <i>Very few people</i> | <i>Some people</i> | <i>Most people</i> | <i>Refused</i> |
| 18. <i>Feels need to avoid visiting people due to drug use</i> | 3239 (27.8)                    | 2165 (18.6)            | 2840 (24.4)        | 3350 (28.7)        | 69 (0.6)       |
| 19. <i>Feels shame brought to family due to drug use</i>       | 2455 (21.0)                    | 2030 (17.4)            | 3110 (26.7)        | 3997 (34.3)        | 71 (0.6)       |
| 20. <i>Feels guilty about drug use</i>                         | 2123 (18.2)                    | 1939 (16.6)            | 3095 (26.5)        | 4446 (38.1)        | 60 (0.5)       |
| 21. <i>Feels disgusting about drug use</i>                     | 2551 (21.9)                    | 2141 (18.4)            | 2966 (25.4)        | 3945 (33.8)        | 60 (0.5)       |
| 22. <i>Uses drugs as a payment for karma or sins</i>           | 4445 (38.1)                    | 1757 (15.1)            | 2259 (19.4)        | 3128 (26.8)        | 74 (0.6)       |

Note: Data are unweighted. There were 11,213 participants who had complete data on all stigma item measures when considering refusals as missing data.

Abbreviation(s): PWUD, people who use drugs

**Supplemental Figure 2.** Principal components analysis, visualization of Cattell's scree plot, and Horn's parallel analysis of the stigma items (n=11,213). Analyses were conducted using a polychoric correlation matrix. Horn's parallel analysis was conducted with 10000 replications. There were four factors with an eigenvalue >1.0 (Kaiser criterion) and these four factors explained 78.7% of the total variance.

|                                  | Factor 1 | Factor 2 | Factor 3 | Factor 4 |
|----------------------------------|----------|----------|----------|----------|
| Eigenvalue                       | 10.27    | 4.10     | 1.62     | 1.33     |
| Percentage of Variance Explained | 46.7%    | 18.7%    | 7.4%     | 6.1%     |

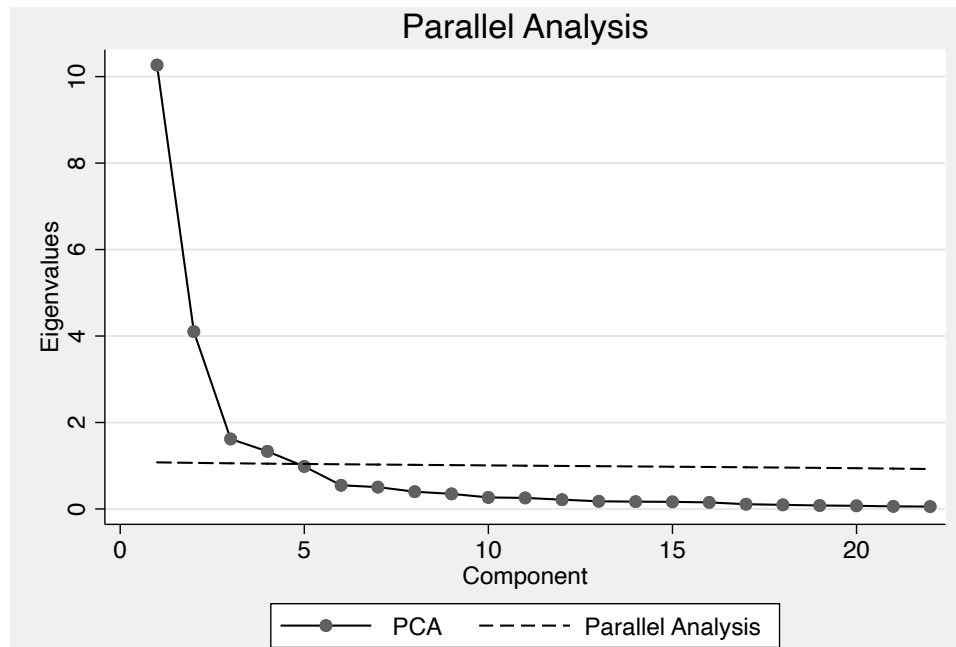

**Supplemental Table 2.** Pattern matrix and communalities of each stigma item (n=11,213).

|                                                                | Factor 1    | Factor 2    | Factor 3    | Factor 4    | $h^2$ |
|----------------------------------------------------------------|-------------|-------------|-------------|-------------|-------|
| <b>Enacted stigma items</b>                                    |             |             |             |             |       |
| 1. <i>Mistreated by hospital worker</i>                        | <b>0.70</b> | 0.21        | -0.11       | 0.01        | 0.67  |
| 2. <i>Denied medical care or hospital services</i>             | <b>0.74</b> | 0.24        | -0.15       | 0.03        | 0.77  |
| 3. <i>Told to stay away from children</i>                      | <b>0.82</b> | -0.01       | 0.07        | 0.02        | 0.71  |
| 4. <i>Forced to move out of home by family</i>                 | <b>0.89</b> | -0.09       | 0.10        | -0.02       | 0.75  |
| 5. <i>Received threat of physical harm</i>                     | <b>0.84</b> | -0.08       | 0.10        | 0.00        | 0.70  |
| 6. <i>Denied housing</i>                                       | <b>0.75</b> | 0.18        | -0.05       | 0.00        | 0.74  |
| <b>Vicarious stigma items</b>                                  |             |             |             |             |       |
| 7. <i>Mistreated by hospital workers</i>                       | 0.27        | <b>0.63</b> | 0.06        | -0.03       | 0.69  |
| 8. <i>Mistreated when getting HIV testing</i>                  | 0.05        | <b>0.92</b> | -0.11       | 0.03        | 0.85  |
| 9. <i>Mistreated when getting HIV treatment</i>                | -0.02       | <b>0.98</b> | -0.13       | 0.04        | 0.88  |
| 10. <i>Refused care from family when sick</i>                  | 0.05        | <b>0.69</b> | 0.23        | -0.02       | 0.66  |
| 11. <i>Forced to move out of home by family</i>                | 0.07        | <b>0.60</b> | 0.27        | -0.02       | 0.59  |
| 12. <i>Ostracized by community or village</i>                  | 0.05        | <b>0.57</b> | 0.17        | 0.01        | 0.47  |
| <b>Felt normative stigma items</b>                             |             |             |             |             |       |
| 13. <i>Avoid visiting homes of PWUD</i>                        | 0.01        | 0.18        | <b>0.75</b> | 0.02        | 0.71  |
| 14. <i>PWUD bring shame to their families</i>                  | 0.00        | 0.02        | <b>0.94</b> | -0.01       | 0.87  |
| 15. <i>PWUD should feel guilty</i>                             | -0.02       | -0.01       | <b>0.95</b> | 0.03        | 0.92  |
| 16. <i>PWUD are disgusting</i>                                 | -0.01       | -0.02       | <b>0.88</b> | 0.10        | 0.87  |
| 17. <i>PWUD are paying for their karma or sins</i>             | 0.08        | -0.04       | <b>0.57</b> | 0.32        | 0.66  |
| <b>Internalized stigma items</b>                               |             |             |             |             |       |
| 18. <i>Feels need to avoid visiting people due to drug use</i> | -0.03       | 0.07        | 0.24        | <b>0.64</b> | 0.67  |
| 19. <i>Feels shame brought to family due to drug use</i>       | -0.01       | 0.00        | 0.11        | <b>0.84</b> | 0.82  |
| 20. <i>Feels guilty about drug use</i>                         | -0.03       | -0.02       | 0.07        | <b>0.90</b> | 0.86  |
| 21. <i>Feels disgusting about drug use</i>                     | -0.03       | 0.00        | 0.05        | <b>0.91</b> | 0.86  |
| 22. <i>Uses drugs as a payment for karma or sins</i>           | 0.11        | 0.01        | -0.10       | <b>0.82</b> | 0.66  |

**Note:** Factor loadings were estimated via iterated principal factors analysis using a polychoric correlation matrix and an oblique (promax) rotation with Kaiser normalization. Factor loadings >0.4 are shown in bold.

**Supplemental Table 3.** Structure matrix: correlations between items and promax rotated common factors (n=11,213).

|                                                                | Factor 1 | Factor 2 | Factor 3 | Factor 4 |
|----------------------------------------------------------------|----------|----------|----------|----------|
| <b>Enacted stigma items</b>                                    |          |          |          |          |
| 1. <i>Mistreated by hospital worker</i>                        | 0.80     | 0.60     | 0.17     | 0.25     |
| 2. <i>Denied medical care or hospital services</i>             | 0.85     | 0.65     | 0.16     | 0.27     |
| 3. <i>Told to stay away from children</i>                      | 0.84     | 0.52     | 0.31     | 0.34     |
| 4. <i>Forced to move out of home by family</i>                 | 0.86     | 0.48     | 0.31     | 0.31     |
| 5. <i>Received threat of physical harm</i>                     | 0.83     | 0.47     | 0.32     | 0.33     |
| 6. <i>Denied housing</i>                                       | 0.85     | 0.63     | 0.23     | 0.28     |
| <b>Vicarious stigma items</b>                                  |          |          |          |          |
| 7. <i>Mistreated by hospital workers</i>                       | 0.66     | 0.80     | 0.32     | 0.30     |
| 8. <i>Mistreated when getting HIV testing</i>                  | 0.58     | 0.92     | 0.22     | 0.28     |
| 9. <i>Mistreated when getting HIV treatment</i>                | 0.55     | 0.93     | 0.21     | 0.28     |
| 10. <i>Refused care from family when sick</i>                  | 0.52     | 0.78     | 0.46     | 0.36     |
| 11. <i>Forced to move out of home by family</i>                | 0.51     | 0.73     | 0.48     | 0.36     |
| 12. <i>Ostracized by community or village</i>                  | 0.45     | 0.66     | 0.37     | 0.31     |
| <b>Felt normative stigma items</b>                             |          |          |          |          |
| 13. <i>Avoid visiting homes of PWUD</i>                        | 0.34     | 0.44     | 0.83     | 0.52     |
| 14. <i>PWUD bring shame to their families</i>                  | 0.28     | 0.32     | 0.93     | 0.54     |
| 15. <i>PWUD should feel guilty</i>                             | 0.26     | 0.30     | 0.96     | 0.58     |
| 16. <i>PWUD are disgusting</i>                                 | 0.26     | 0.30     | 0.93     | 0.61     |
| 17. <i>PWUD are paying for their karma or sins</i>             | 0.33     | 0.30     | 0.76     | 0.67     |
| <b>Internalized stigma items</b>                               |          |          |          |          |
| 18. <i>Feels need to avoid visiting people due to drug use</i> | 0.30     | 0.34     | 0.63     | 0.79     |
| 19. <i>Feels shame brought to family due to drug use</i>       | 0.31     | 0.30     | 0.60     | 0.90     |
| 20. <i>Feels guilty about drug use</i>                         | 0.28     | 0.27     | 0.58     | 0.92     |
| 21. <i>Feels disgusting about drug use</i>                     | 0.30     | 0.30     | 0.57     | 0.93     |
| 22. <i>Uses drugs as a payment for karma or sins</i>           | 0.36     | 0.31     | 0.41     | 0.80     |

**Supplemental Table 4.** Correlation matrix of the promax rotated common factors (n=11,213).

| Factors  | Factor 1 | Factor 2 | Factor 3 | Factor 4 |
|----------|----------|----------|----------|----------|
| Factor 1 | 1        | -        | -        | -        |
| Factor 2 | 0.61     | 1        | -        | -        |
| Factor 3 | 0.29     | 0.33     | 1        | -        |
| Factor 4 | 0.34     | 0.33     | 0.59     | 1        |

**Supplemental Table 5.** Distribution of standardized stigma subscale scores and internal consistency.

| Stigma subscale       | N      | No. of items | Theoretical score range | Unweighted median score (IQR) | Cronbach's $\alpha$ |
|-----------------------|--------|--------------|-------------------------|-------------------------------|---------------------|
| Enacted stigma        | 11,502 | 6            | 0-3                     | 0.0 (0.0, 0.5)                | 0.85                |
| Vicarious stigma      | 11,503 | 6            | 0-3                     | 0.7 (0.0, 1.2)                | 0.86                |
| Felt normative stigma | 11,351 | 5            | 0-3                     | 1.8 (0.8, 2.4)                | 0.92                |
| Internalized stigma   | 11,510 | 5            | 0-3                     | 1.8 (1.0, 2.4)                | 0.90                |

Note: Data are unweighted. Final subscale scores were calculated by taking the mean (summed item responses / no. of items).

**Supplemental Table 6.** Site-specific distribution of standardized stigma subscale scores and internal consistency.

| Study site    | <i>Enacted stigma</i> |                         |                       |                             |          | <i>Felt normative stigma</i> |                         |                       |          |
|---------------|-----------------------|-------------------------|-----------------------|-----------------------------|----------|------------------------------|-------------------------|-----------------------|----------|
|               | n                     | Unweighted Median (IQR) | Weighted Median (IQR) | score > 0, no. (weighted %) | $\alpha$ | n                            | Unweighted median (IQR) | Weighted median (IQR) | $\alpha$ |
| Aizawl        | 999                   | 0.0 (0.0-0.3)           | 0.0 (0.0-0.2)         | 474 (35.2%)                 | 0.53     | 901                          | 1.2 (0.0-2.2)           | 0.8 (0.0-1.6)         | 0.92     |
| Amritsar      | 999                   | 0.5 (0.2-0.8)           | 0.3 (0.0-0.8)         | 753 (69.7%)                 | 0.71     | 994                          | 2.8 (2.2-3.0)           | 2.8 (2.2-3.0)         | 0.80     |
| Bilaspur      | 998                   | 0.0 (0.0-0.3)           | 0.0 (0.0-0.2)         | 354 (28.4%)                 | 0.92     | 1000                         | 0.6 (0.0-1.4)           | 0.2 (0.0-1.2)         | 0.92     |
| Chandigarh    | 990                   | 0.0 (0.0-0.3)           | 0.0 (0.0-0.3)         | 378 (33.8%)                 | 0.74     | 984                          | 2.0 (1.6-2.6)           | 2.2 (1.6-2.6)         | 0.84     |
| Churachandpur | 993                   | 0.8 (0.0-1.5)           | 0.8 (0.0-1.3)         | 667 (72.7%)                 | 0.94     | 993                          | 2.0 (1.6-2.8)           | 2.0 (1.2-2.0)         | 0.95     |
| New Delhi     | 992                   | 0.2 (0.0-0.7)           | 0.0 (0.0-0.7)         | 509 (49.6%)                 | 0.78     | 996                          | 1.4 (0.6-2.0)           | 1.4 (0.6-2.0)         | 0.94     |
| Dimapur       | 994                   | 0.0 (0.0-0.0)           | 0.0 (0.0-0.0)         | 127 (14.2%)                 | 0.84     | 998                          | 1.6 (1.0-2.0)           | 1.4 (1.0-2.0)         | 0.85     |
| Imphal        | 995                   | 0.0 (0.0-0.3)           | 0.0 (0.0-0.3)         | 390 (33.5%)                 | 0.81     | 995                          | 1.0 (0.4-2.2)           | 1.2 (0.2-2.2)         | 0.91     |
| Kanpur        | 965                   | 0.3 (0.0-0.8)           | 0.3 (0.0-0.8)         | 576 (60.7%)                 | 0.70     | 975                          | 2.0 (1.4-2.4)           | 2.0 (1.4-2.4)         | 0.74     |
| Ludhiana      | 971                   | 0.0 (0.0-0.3)           | 0.0 (0.0-0.0)         | 265 (21.8%)                 | 0.96     | 972                          | 3.0 (1.2-3.0)           | 2.6 (0.8-3.0)         | 0.95     |
| Lunglei       | 898                   | 0.0 (0.0-0.0)           | 0.0 (0.0-0.0)         | 144 (11.7%)                 | 0.80     | 871                          | 1.2 (0.6-2.0)           | 2.0 (1.0-2.0)         | 0.93     |
| Mumbai        | 708                   | 0.5 (0.0-1.0)           | 0.5 (0.0-1.0)         | 493 (68.1%)                 | 0.74     | 672                          | 1.8 (1.0-2.6)           | 1.6 (0.8-2.4)         | 0.90     |

  

| Study site    | <i>Vicarious stigma</i> |                         |                       |                             |          | <i>Internalized stigma</i> |                         |                       |          |
|---------------|-------------------------|-------------------------|-----------------------|-----------------------------|----------|----------------------------|-------------------------|-----------------------|----------|
|               | n                       | Unweighted median (IQR) | Weighted median (IQR) | score > 0, no. (weighted %) | $\alpha$ | n                          | Unweighted median (IQR) | Weighted median (IQR) | $\alpha$ |
| Aizawl        | 995                     | 0.3 (0.0-0.7)           | 0.2 (0.0-0.5)         | 674 (61.6%)                 | 0.75     | 986                        | 1.6 (1.2-2.0)           | 1.6 (1.0-2.0)         | 0.70     |
| Amritsar      | 995                     | 1.0 (0.7-1.5)           | 1.0 (0.7-1.7)         | 956 (94.4%)                 | 0.79     | 999                        | 2.6 (2.0-3.0)           | 2.8 (2.2-3.0)         | 0.82     |
| Bilaspur      | 1000                    | 0.2 (0.0-1.0)           | 0.0 (0.0-1.0)         | 530 (43.0%)                 | 0.92     | 1000                       | 0.4 (0.0-1.6)           | 0.2 (0.0-1.2)         | 0.93     |
| Chandigarh    | 988                     | 0.7 (0.0-1.2)           | 0.7 (0.0-1.3)         | 650 (64.2%)                 | 0.82     | 987                        | 1.6 (1.2-2.0)           | 1.8 (1.2-2.0)         | 0.73     |
| Churachandpur | 992                     | 1.0 (0.3-1.8)           | 1.0 (0.5-1.7)         | 817 (91.6%)                 | 0.93     | 993                        | 2.0 (1.4-3.0)           | 2.0 (1.0-2.8)         | 0.95     |
| New Delhi     | 998                     | 1.0 (0.3-1.5)           | 1.0 (0.3-1.5)         | 823 (81.2%)                 | 0.82     | 997                        | 1.8 (1.0-2.2)           | 1.8 (1.0-2.2)         | 0.88     |
| Dimapur       | 998                     | 0.2 (0.0-0.7)           | 0.2 (0.0-0.7)         | 537 (54.7%)                 | 0.79     | 996                        | 1.0 (0.2-1.6)           | 1.0 (0.0-1.6)         | 0.87     |
| Imphal        | 995                     | 0.2 (0.0-0.8)           | 0.0 (0.0-0.7)         | 527 (48.0%)                 | 0.90     | 997                        | 1.2 (0.4-2.0)           | 1.0 (0.2-1.8)         | 0.88     |
| Kanpur        | 989                     | 1.0 (0.5-1.5)           | 1.0 (0.5-1.7)         | 889 (88.7%)                 | 0.75     | 989                        | 2.4 (1.8-2.8)           | 2.4 (1.8-2.8)         | 0.74     |
| Ludhiana      | 973                     | 0.0 (0.0-0.8)           | 0.0 (0.0-0.7)         | 325 (29.1%)                 | 0.96     | 973                        | 3.0 (2.4-3.0)           | 3.0 (1.8-3.0)         | 0.96     |
| Lunglei       | 875                     | 0.3 (0.0-1.0)           | 0.5 (0.2-1.0)         | 579 (79.9%)                 | 0.83     | 878                        | 0.8 (0.4-2.0)           | 1.6 (0.8-2.2)         | 0.94     |
| Mumbai        | 705                     | 0.8 (0.3-1.2)           | 0.8 (0.3-1.2)         | 594 (83.4%)                 | 0.72     | 715                        | 1.8 (1.0-2.4)           | 1.6 (0.8-2.4)         | 0.85     |

Note: Data are unweighted, unless noted otherwise. Weighted score distributions and percentages where indicated were calculated using RDS-II weights.

**Supplemental Table 7.** Association of drug use stigma subscale scores and active HCV infection (unweighted sensitivity analysis).

| Drug use stigma subscale       | Outcome: HCV RNA-positive |                                      |                                                    |                                                    |
|--------------------------------|---------------------------|--------------------------------------|----------------------------------------------------|----------------------------------------------------|
|                                | % (n/N)                   | Univariable OR (95% CI) <sup>a</sup> | Multivariable Model 1: aOR (95% CI) <sup>a,b</sup> | Multivariable Model 2: aOR (95% CI) <sup>a,c</sup> |
| <b>Categorical variables</b>   |                           |                                      |                                                    |                                                    |
| Enacted stigma                 |                           |                                      |                                                    |                                                    |
| <i>Never</i>                   | 37.9% (2414/6372)         | Ref.                                 | Ref.                                               | Ref.                                               |
| <i>Ever</i>                    | 50.6% (2598/5130)         | 1.28 (1.17-1.39)                     | 1.28 (1.17-1.40)                                   | 1.17 (1.07-1.28)                                   |
| Vicarious stigma               |                           |                                      |                                                    |                                                    |
| <i>Never</i>                   | 40.8% (1471/3602)         | Ref.                                 | Ref.                                               | Ref.                                               |
| <i>Ever</i>                    | 44.9% (3544/7901)         | 1.06 (0.97-1.17)                     | 1.11 (1.00-1.22)                                   | 1.02 (0.92-1.13)                                   |
| Felt/normative stigma          |                           |                                      |                                                    |                                                    |
| < 25 <sup>th</sup> percentile  | 44.6% (1029/2305)         | Ref.                                 | Ref.                                               | Ref.                                               |
| 25-75 <sup>th</sup> percentile | 41.4% (2668/6446)         | 1.00 (0.90-1.12)                     | 1.01 (0.90-1.13)                                   | 0.92 (0.82-1.04)                                   |
| > 75 <sup>th</sup> percentile  | 47.8% (1243/2600)         | 1.05 (0.91-1.20)                     | 1.05 (0.91-1.21)                                   | 0.96 (0.83-1.12)                                   |
| Internalized stigma            |                           |                                      |                                                    |                                                    |
| < 25 <sup>th</sup> percentile  | 34.5% (982/2850)          | Ref.                                 | Ref.                                               | Ref.                                               |
| 25-75 <sup>th</sup> percentile | 45.8% (2715/5933)         | 1.21 (1.09-1.35)                     | 1.22 (1.09-1.36)                                   | 1.11 (0.99-1.24)                                   |
| > 75 <sup>th</sup> percentile  | 48.5% (1323/2727)         | 1.33 (1.16-1.52)                     | 1.32 (1.15-1.51)                                   | 1.23 (1.07-1.42)                                   |
| <b>Continuous variables</b>    |                           |                                      |                                                    |                                                    |
| Enacted stigma                 | n = 11,502                | 1.13 (1.06-1.22)                     | 1.17 (1.08-1.26)                                   | 1.11 (1.02-1.19)                                   |
| Vicarious stigma               | n = 11,503                | 1.03 (0.97-1.09)                     | 1.05 (0.99-1.11)                                   | 1.02 (0.96-1.08)                                   |
| Felt/normative stigma          | n = 11,351                | 1.01 (0.96-1.05)                     | 1.00 (0.95-1.05)                                   | 0.97 (0.93-1.02)                                   |
| Internalized stigma            | n = 11,510                | 1.12 (1.06-1.17)                     | 1.11 (1.06-1.17)                                   | 1.07 (1.02-1.13)                                   |

Note: Data are unweighted. Percentile-based categories are based on the unweighted distribution in the overall study population.

<sup>a</sup>Odds ratios (OR) were estimated from multilevel logistic regression models with a random-intercept for each site.

<sup>b</sup>Multivariable model 1: age group, gender, northeast region, educational attainment, experiencing homelessness, history of incarceration in the past 6 months, alcohol use/dependence (AUDIT), northeast region and HIV status.

<sup>c</sup>Multivariable model 2: age group, gender, northeast region, educational attainment, experiencing homelessness, history of incarceration in the past 6 months, alcohol use/dependence (AUDIT), northeast region, HIV status, frequency of injection in the past 6 mo. (none, yes-non-daily, yes-daily) and ever sharing needles.



**Supplemental Table 8.** Association of individual drug use stigma items with active HCV infection (unweighted sensitivity analysis).

| Drug use stigma items                                            | Outcome: HCV RNA-positive             |                                           |                                      |                                                    |                                                    |
|------------------------------------------------------------------|---------------------------------------|-------------------------------------------|--------------------------------------|----------------------------------------------------|----------------------------------------------------|
|                                                                  | % HCV RNA+ (n/N)                      | % HCV RNA+ (n/N)                          | Univariable OR (95% CI) <sup>a</sup> | Multivariable Model 1: aOR (95% CI) <sup>a,b</sup> | Multivariable Model 2: aOR (95% CI) <sup>a,c</sup> |
| <b>Enacted stigma items</b> (Ref: never)                         | <i>Never (0)</i>                      | <i>Ever (1-3)</i>                         |                                      |                                                    |                                                    |
| 1. <i>Mistreated by hospital worker</i>                          | 41.7% (4127/9901)                     | 52.2% (919/1762)                          | 1.15 (1.02-1.28)                     | 1.12 (1.00-1.26)                                   | 1.11 (0.99-1.25)                                   |
| 2. <i>Denied medical care or hospital services</i>               | 42.0% (4214/10037)                    | 51.2% (832/1626)                          | 1.15 (1.03-1.29)                     | 1.13 (1.00-1.27)                                   | 1.13 (1.00-1.28)                                   |
| 3. <i>Told to stay away from children</i>                        | 41.3% (3749/9075)                     | 50.1% (1297/2588)                         | 1.14 (1.03-1.26)                     | 1.18 (1.07-1.32)                                   | 1.12 (1.00-1.24)                                   |
| 4. <i>Forced to move out of home by family</i>                   | 40.7% (3455/8481)                     | 50.0% (1591/3182)                         | 1.16 (1.06-1.27)                     | 1.22 (1.11-1.35)                                   | 1.15 (1.04-1.27)                                   |
| 5. <i>Received threat of physical harm</i>                       | 39.7% (3128/7873)                     | 50.6% (1918/3790)                         | 1.16 (1.07-1.27)                     | 1.18 (1.07-1.29)                                   | 1.09 (1.00-1.20)                                   |
| 6. <i>Denied housing</i>                                         | 41.9% (3943/9407)                     | 48.9% (1103/2256)                         | 1.15 (1.04-1.27)                     | 1.19 (1.06-1.32)                                   | 1.15 (1.03-1.29)                                   |
| <b>Vicarious stigma items</b> (Ref: never)                       | <i>Never (0)</i>                      | <i>Ever (1-3)</i>                         |                                      |                                                    |                                                    |
| 7. <i>Mistreated by hospital workers</i>                         | 41.0% (3261/7956)                     | 48.2% (1785/3707)                         | 1.10 (1.01-1.20)                     | 1.12 (1.02-1.23)                                   | 1.08 (0.98-1.18)                                   |
| 8. <i>Mistreated when getting HIV testing</i>                    | 42.0% (3626/8636)                     | 46.9% (1420/3027)                         | 1.02 (0.93-1.12)                     | 1.03 (0.93-1.13)                                   | 1.02 (0.92-1.12)                                   |
| 9. <i>Mistreated when getting HIV treatment</i>                  | 42.0% (3600/8575)                     | 46.8% (1446/3088)                         | 1.04 (0.95-1.14)                     | 1.04 (0.95-1.14)                                   | 1.03 (0.94-1.14)                                   |
| 10. <i>Refused care from family when sick</i>                    | 40.1% (2337/5823)                     | 46.4% (2709/5840)                         | 1.07 (0.98-1.17)                     | 1.11 (1.01-1.21)                                   | 1.05 (0.96-1.15)                                   |
| 11. <i>Forced to move out of home by family</i>                  | 40.5% (2068/5101)                     | 45.4% (2978/6562)                         | 1.07 (0.98-1.17)                     | 1.10 (1.01-1.21)                                   | 1.04 (0.94-1.14)                                   |
| 12. <i>Ostracized by community or village</i>                    | 42.1% (2439/5789)                     | 44.4% (2607/5874)                         | 1.09 (1.00-1.18)                     | 1.11 (1.02-1.21)                                   | 1.06 (0.97-1.16)                                   |
| <b>Felt/normative stigma items</b> (Ref: no one/very few people) | <i>No one / very few people (0-1)</i> | <i>Some / most people (2-3)</i>           |                                      |                                                    |                                                    |
| 13. <i>Avoid visiting homes of PWUD</i>                          | 42.3% (2454/5798)                     | 44.2% (2592/5865)                         | 1.00 (0.92-1.09)                     | 1.00 (0.92-1.10)                                   | 0.97 (0.88-1.06)                                   |
| 14. <i>PWUD bring shame to their families</i>                    | 41.8% (2036/4875)                     | 44.3% (3010/6788)                         | 1.02 (0.93-1.11)                     | 1.00 (0.92-1.10)                                   | 0.95 (0.87-1.05)                                   |
| 15. <i>PWUD should feel guilty</i>                               | 42.0% (1928/4586)                     | 44.1% (3118/7077)                         | 1.01 (0.93-1.11)                     | 1.00 (0.91-1.10)                                   | 0.96 (0.87-1.06)                                   |
| 16. <i>PWUD are disgusting</i>                                   | 42.5% (1957/4604)                     | 43.8% (3089/7059)                         | 0.99 (0.90-1.08)                     | 0.99 (0.90-1.08)                                   | 0.94 (0.85-1.03)                                   |
| 17. <i>PWUD are paying for their karma or sins</i>               | 42.6% (2393/5619)                     | 43.9% (2653/6044)                         | 0.99 (0.91-1.08)                     | 0.97 (0.89-1.07)                                   | 0.96 (0.87-1.05)                                   |
| <b>Internalized stigma items</b> (Ref: not at all/a little)      | <i>Not at all / a little (0-1)</i>    | <i>A fair amount / a great deal (2-3)</i> |                                      |                                                    |                                                    |
| 18. <i>Feels need to avoid visiting people due to drug use</i>   | 40.0% (2188/5473)                     | 46.2% (2858/6190)                         | 1.13 (1.04-1.23)                     | 1.12 (1.02-1.22)                                   | 1.07 (0.98-1.17)                                   |
| 19. <i>Feels shame brought to family due to drug use</i>         | 37.0% (1685/4556)                     | 47.3% (3361/7107)                         | 1.21 (1.10-1.32)                     | 1.20 (1.09-1.32)                                   | 1.11 (1.01-1.23)                                   |
| 20. <i>Feels guilty about drug use</i>                           | 35.1% (1445/4122)                     | 47.8% (3601/7541)                         | 1.23 (1.12-1.35)                     | 1.26 (1.15-1.39)                                   | 1.19 (1.08-1.32)                                   |
| 21. <i>Feels disgusting about drug use</i>                       | 37.9% (1801/4752)                     | 47.0% (3245/6911)                         | 1.13 (1.03-1.23)                     | 1.12 (1.02-1.23)                                   | 1.06 (0.97-1.17)                                   |
| 22. <i>Uses drugs as a payment for karma or sins</i>             | 39.1% (2456/6276)                     | 48.1% (2590/5387)                         | 1.13 (1.03-1.23)                     | 1.13 (1.03-1.24)                                   | 1.10 (1.01-1.21)                                   |

Note: Data are unweighted.

<sup>a</sup> Odds ratios (OR) were estimated from multilevel logistic regression models with a random-intercept for each site.

<sup>b</sup> Multivariable model 1: age group, gender, northeast region, educational attainment, experiencing homelessness, history of incarceration in the past 6 months, alcohol use/dependence (AUDIT), and HIV status.

<sup>c</sup> Multivariable model 2: age group, gender, northeast region, educational attainment, experiencing homelessness, history of incarceration in the past 6 months, alcohol use/dependence (AUDIT), HIV status, frequency of injection in the past 6 mo. (none, yes-non-daily, yes-daily) and ever sharing needles/syringes.

**Supplemental Table 9.** Association of drug use stigma subscale scores with injection drug use behaviors in the past 6 months among active people who inject drugs in the past 6 months (unweighted sensitivity analysis).

| Drug use stigma     | Outcome: <i>Daily injection drug use</i>    |                          |                             | Outcome: <i>Shared needles/syringes</i>             |                          |                             |
|---------------------|---------------------------------------------|--------------------------|-----------------------------|-----------------------------------------------------|--------------------------|-----------------------------|
|                     | % (n/N)                                     | OR (95% CI) <sup>a</sup> | aOR (95% CI) <sup>a,b</sup> | % (n/N)                                             | OR (95% CI) <sup>a</sup> | aOR (95% CI) <sup>a,b</sup> |
| Enacted             |                                             |                          |                             |                                                     |                          |                             |
| <i>Never</i>        | 59.5% (2800/4706)                           | Ref.                     | Ref.                        | 35.1% (1651/4706)                                   | Ref.                     | Ref.                        |
| <i>Ever</i>         | 73.3% (3265/4455)                           | 1.33 (1.20-1.47)         | 1.31 (1.18-1.45)            | 49.2% (2192/4455)                                   | 1.54 (1.40-1.69)         | 1.47 (1.33-1.62)            |
| Vicarious           |                                             |                          |                             |                                                     |                          |                             |
| <i>Never</i>        | 60.1% (1572/2614)                           | Ref.                     | Ref.                        | 34.9% (913/2614)                                    | Ref.                     | Ref.                        |
| <i>Ever</i>         | 68.7% (4501/6548)                           | 1.21 (1.08-1.35)         | 1.22 (1.09-1.37)            | 44.8% (2935/6548)                                   | 1.32 (1.19-1.47)         | 1.33 (1.19-1.48)            |
| Felt normative      |                                             |                          |                             |                                                     |                          |                             |
| <25 <sup>th</sup>   | 60.3% (1060/1757)                           | Ref.                     | Ref.                        | 33.4% (587/1757)                                    | Ref.                     | Ref.                        |
| 25-75 <sup>th</sup> | 66.8% (3390/5075)                           | 1.15 (1.01-1.32)         | 1.17 (1.02-1.34)            | 41.3% (2097/5075)                                   | 1.43 (1.26-1.62)         | 1.45 (1.27-1.65)            |
| >75 <sup>th</sup>   | 71.0% (1563/2202)                           | 1.05 (0.89-1.24)         | 1.06 (0.90-1.26)            | 50.0% (1100/2202)                                   | 1.46 (1.25-1.71)         | 1.47 (1.25-1.73)            |
| Internalized        |                                             |                          |                             |                                                     |                          |                             |
| <25 <sup>th</sup>   | 54.3% (1084/1995)                           | Ref.                     | Ref.                        | 28.4% (566/1995)                                    | Ref.                     | Ref.                        |
| 25-75 <sup>th</sup> | 69.1% (3328/4813)                           | 1.16 (1.02-1.32)         | 1.17 (1.03-1.33)            | 44.8% (2158/4813)                                   | 1.47 (1.30-1.67)         | 1.54 (1.35-1.75)            |
| >75 <sup>th</sup>   | 70.7% (1668/2360)                           | 0.96 (0.82-1.12)         | 0.96 (0.82-1.13)            | 47.9% (1131/2360)                                   | 1.43 (1.23-1.66)         | 1.49 (1.28-1.74)            |
| Drug use stigma     | Outcome: <i>Multiple injection partners</i> |                          |                             | Outcome: <i>Injection drug use in public spaces</i> |                          |                             |
|                     | % (n/N)                                     | OR (95% CI) <sup>a</sup> | aOR (95% CI) <sup>a,b</sup> | % (n/N)                                             | OR (95% CI) <sup>a</sup> | aOR (95% CI) <sup>a,b</sup> |
| Enacted             |                                             |                          |                             |                                                     |                          |                             |
| <i>Never</i>        | 66.2% (3101/4686)                           | Ref.                     | Ref.                        | 72.8% (3426/4706)                                   | Ref.                     | Ref.                        |
| <i>Ever</i>         | 76.4% (3401/4451)                           | 1.65 (1.49-1.83)         | 1.57 (1.42-1.74)            | 79.7% (3549/4455)                                   | 1.24 (1.11-1.38)         | 1.13 (1.01-1.27)            |
| Vicarious           |                                             |                          |                             |                                                     |                          |                             |
| <i>Never</i>        | 66.3% (1729/2606)                           | Ref.                     | Ref.                        | 67.8% (1772/2614)                                   | Ref.                     | Ref.                        |
| <i>Ever</i>         | 73.2% (4782/6530)                           | 1.54 (1.38-1.72)         | 1.50 (1.34-1.68)            | 79.5% (5204/6548)                                   | 1.54 (1.37-1.73)         | 1.50 (1.33-1.70)            |
| Felt normative      |                                             |                          |                             |                                                     |                          |                             |
| <25 <sup>th</sup>   | 64.7% (1133/1752)                           | Ref.                     | Ref.                        | 68.4% (1201/1757)                                   | Ref.                     | Ref.                        |
| 25-75 <sup>th</sup> | 71.1% (3599/5059)                           | 1.34 (1.18-1.52)         | 1.31 (1.15-1.49)            | 76.8% (3896/5075)                                   | 1.59 (1.38-1.83)         | 1.56 (1.35-1.81)            |
| >75 <sup>th</sup>   | 78.1% (1720/2201)                           | 1.47 (1.25-1.73)         | 1.42 (1.20-1.68)            | 82.4% (1815/2202)                                   | 2.47 (2.06-2.96)         | 2.40 (1.99-2.90)            |
| Internalized        |                                             |                          |                             |                                                     |                          |                             |
| <25 <sup>th</sup>   | 63.5% (1257/1981)                           | Ref.                     | Ref.                        | 69.2% (1381/1995)                                   | Ref.                     | Ref.                        |
| 25-75 <sup>th</sup> | 73.8% (3548/4808)                           | 1.48 (1.31-1.68)         | 1.50 (1.32-1.70)            | 76.8% (3698/4813)                                   | 1.31 (1.15-1.51)         | 1.33 (1.16-1.53)            |
| >75 <sup>th</sup>   | 72.7% (1716/2359)                           | 1.19 (1.02-1.39)         | 1.19 (1.02-1.39)            | 81.2% (1917/2360)                                   | 2.02 (1.70-2.40)         | 2.01 (1.68-2.40)            |

Note: Data are unweighted. Percentile-based categories are based on the unweighted distribution in the overall study population.

<sup>a</sup> Odds ratios (OR) were estimated from multilevel logistic regression models with a random-intercept for each site.

<sup>b</sup> Multivariable model: age group, gender, northeast region, educational attainment, experiencing homelessness, history of incarceration in the past 6 months, alcohol use/dependence (AUDIT), and HIV status.

**Supplemental Table 10.** Association of drug use stigma subscale scores with hepatitis C virus antibody serostatus (sensitivity analysis).

| Drug use stigma                | n      | Outcome: HCV antibody positive |                                      |                                                    |                                                    |
|--------------------------------|--------|--------------------------------|--------------------------------------|----------------------------------------------------|----------------------------------------------------|
|                                |        | % <sup>a</sup>                 | Univariable OR (95% CI) <sup>b</sup> | Multivariable Model 1: aOR (95% CI) <sup>b,c</sup> | Multivariable Model 2: aOR (95% CI) <sup>b,d</sup> |
| <b>Categorical variables</b>   |        |                                |                                      |                                                    |                                                    |
| Enacted stigma                 |        |                                |                                      |                                                    |                                                    |
| <i>Never</i>                   | 6,372  | 36.1                           | Ref.                                 | Ref.                                               | Ref.                                               |
| <i>Ever</i>                    | 5,130  | 55.0                           | 1.56 (1.29-1.88)                     | 1.61 (1.37-1.90)                                   | 1.50 (1.25-1.81)                                   |
| Vicarious stigma               |        |                                |                                      |                                                    |                                                    |
| <i>Never</i>                   | 3,602  | 40.1                           | Ref.                                 | Ref.                                               | Ref.                                               |
| <i>Ever</i>                    | 7,901  | 44.9                           | 1.09 (0.90-1.31)                     | 1.14 (0.95-1.37)                                   | 1.08 (0.92-1.28)                                   |
| Felt/normative stigma          |        |                                |                                      |                                                    |                                                    |
| < 25 <sup>th</sup> percentile  | 2,862  | 44.5                           | Ref.                                 | Ref.                                               | Ref.                                               |
| 25-75 <sup>th</sup> percentile | 5,889  | 39.2                           | 1.11 (0.88-1.41)                     | 1.10 (0.86-1.41)                                   | 1.04 (0.83-1.30)                                   |
| > 75 <sup>th</sup> percentile  | 2,600  | 52.9                           | 1.11 (0.83-1.48)                     | 1.03 (0.76-1.41)                                   | 0.99 (0.71-1.37)                                   |
| Internalized stigma            |        |                                |                                      |                                                    |                                                    |
| < 25 <sup>th</sup> percentile  | 2,850  | 28.8                           | Ref.                                 | Ref.                                               | Ref.                                               |
| 25-75 <sup>th</sup> percentile | 6,338  | 45.6                           | 1.52 (1.14-2.03)                     | 1.49 (1.15-1.94)                                   | 1.41 (1.08-1.83)                                   |
| > 75 <sup>th</sup> percentile  | 2,322  | 55.4                           | 1.79 (1.25-2.57)                     | 1.65 (1.10-2.48)                                   | 1.60 (1.04-2.45)                                   |
| <b>Continuous variables</b>    |        |                                |                                      |                                                    |                                                    |
| Enacted stigma                 | 11,502 | -                              | 1.29 (1.13-1.47)                     | 1.36 (1.24-1.48)                                   | 1.28 (1.15-1.43)                                   |
| Vicarious stigma               | 11,503 | -                              | 1.18 (1.00-1.40)                     | 1.21 (1.05-1.40)                                   | 1.18 (1.01-1.39)                                   |
| Felt/normative stigma          | 11,351 | -                              | 1.06 (0.96-1.17)                     | 1.03 (0.94-1.14)                                   | 1.01 (0.91-1.11)                                   |
| Internalized stigma            | 11,510 | -                              | 1.24 (1.09-1.40)                     | 1.20 (1.06-1.38)                                   | 1.16 (1.02-1.32)                                   |

<sup>a</sup> Seroprevalence of HCV antibody was estimated using a composite weight of the relative city size and RDS-II weights.

<sup>b</sup> Separately for each stigma subscale, odds ratios (OR) of hepatitis C virus infection were estimated from a multilevel logistic regression model with a random-intercept for each site and scaled RDS-II weights.

<sup>c</sup> Multivariable model 1 included adjustment for age group, gender, northeast region, educational attainment, experiencing homelessness, history of incarceration in the past 6 months, alcohol use/dependence (AUDIT), and HIV status.

<sup>d</sup> Multivariable model 2 included adjustment for age group, gender, northeast region, educational attainment, experiencing homelessness, history of incarceration in the past 6 months, alcohol use/dependence (AUDIT), HIV status, frequency of injection in the past 6 months and a history of ever sharing needles/syringes.
